# Supplementary material
Source: Springer Nature journal article supplement (http://www.springermedizin.de/resource/supplementary/12974_2010_288_MOESM3_ESM.pdf/9601170)

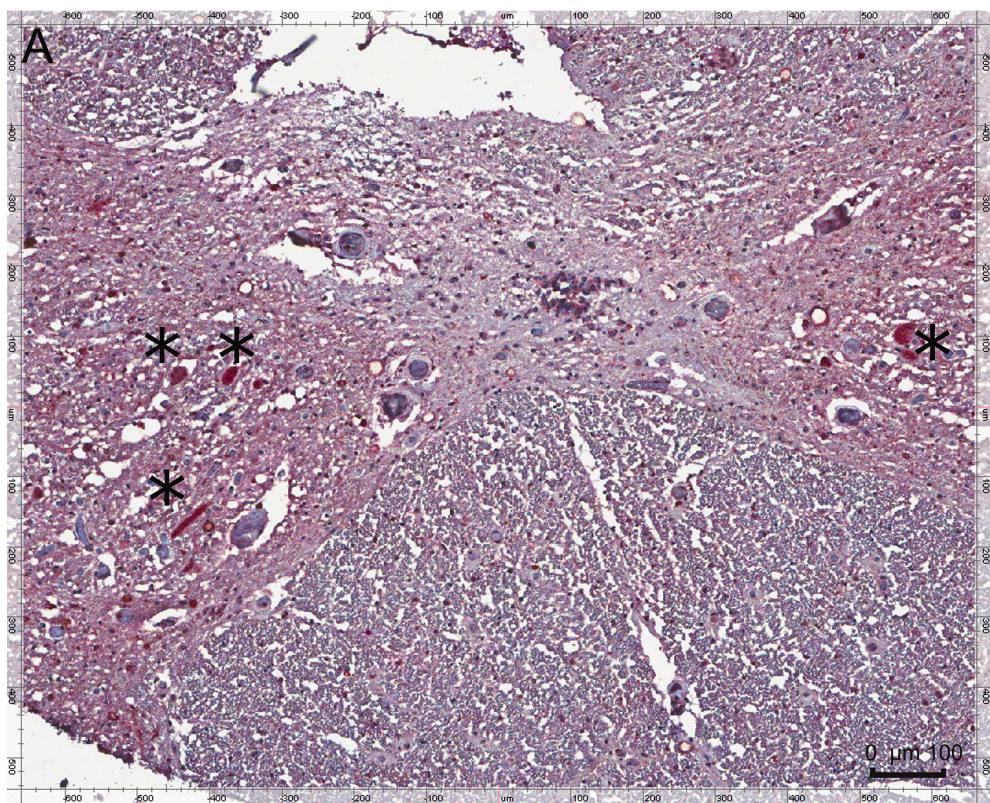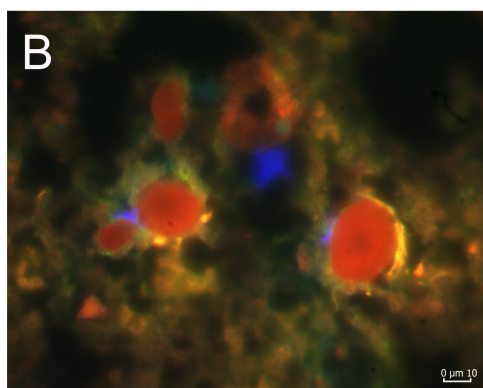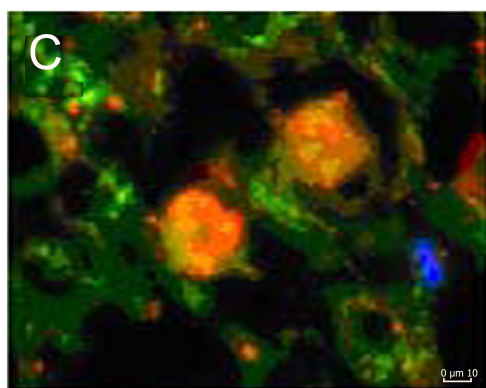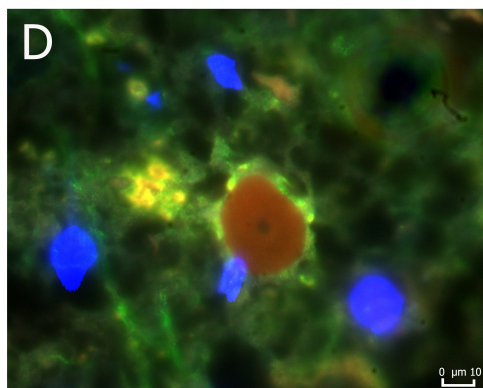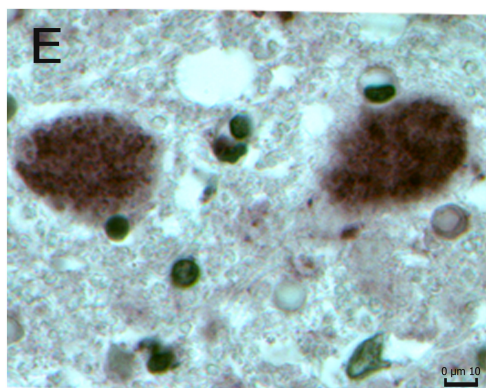

Supplement: MOESM3 [file 9601170]
